# Supplementary material
Source: publisher figshare collection journal article supplement (https://tandf.figshare.com/ndownloader/files/36011605)
Supplement: Supplementary file 1 [file 36011605]

## Sheet: table 2 .
Table S3：The information of mRNA transcripts
mRNA_ID	Stage	Sex	Reads	Rate
ADBJ_A	2	Male	83783334	0.8555
ADBJ_B	2	Male	101105706	0.8869
ADBJ_C	2	Male	101766698	0.8665
NoADBJ_A	24	Male	80827370	0.8885
NoADBJ_A	24	Male	90589596	0.9079
NoADBJ_A	24	Male	100131622	0.8959
